# Supplementary material
Source: PubMed Central journal article supplement (PMC2084308)

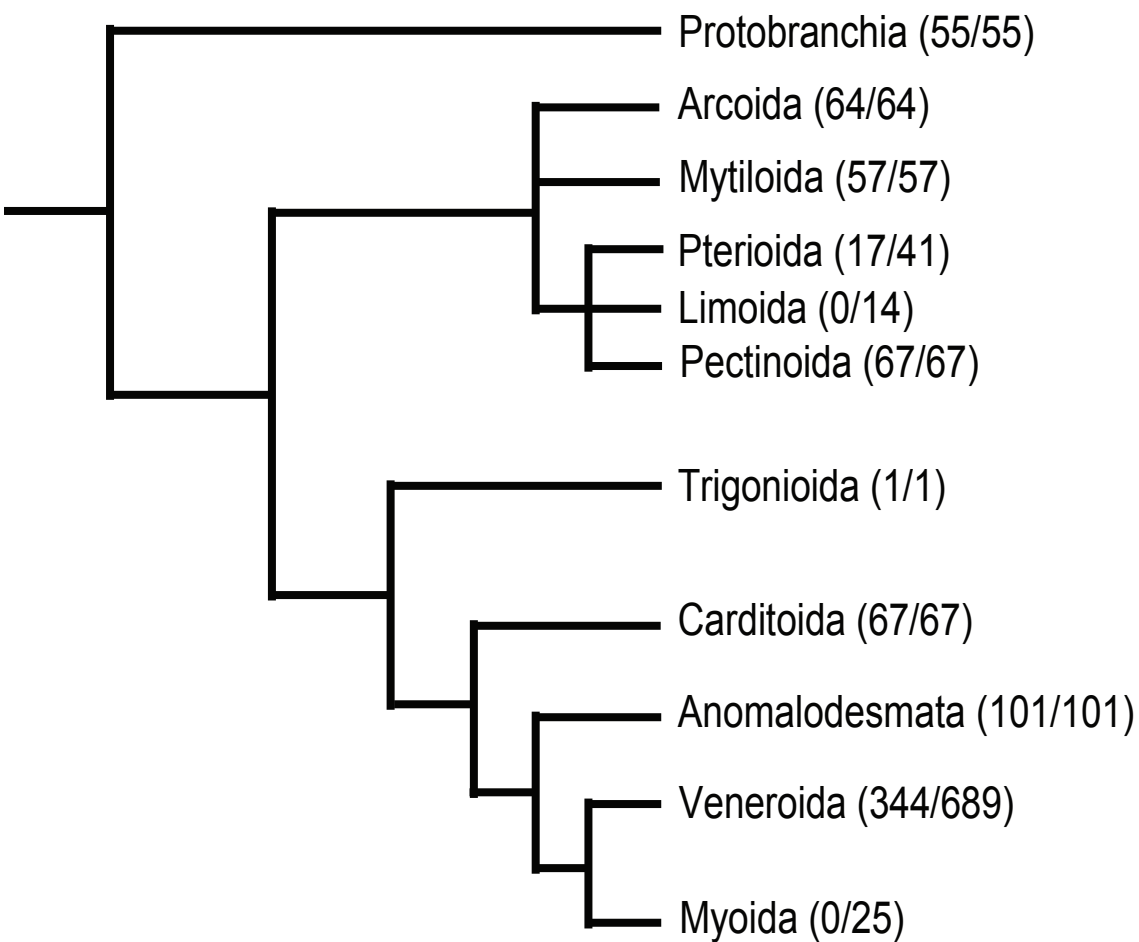

Supplement: pnas_0709202104_1.pdf [file pnas_0709202104_1.pdf]

Proportion of Genera

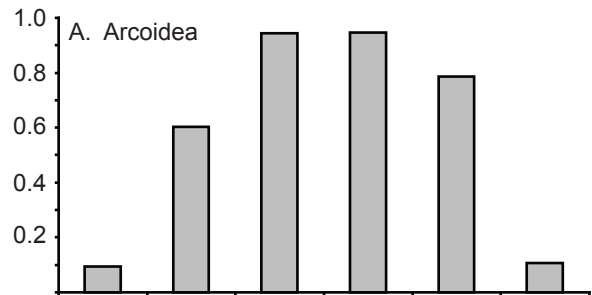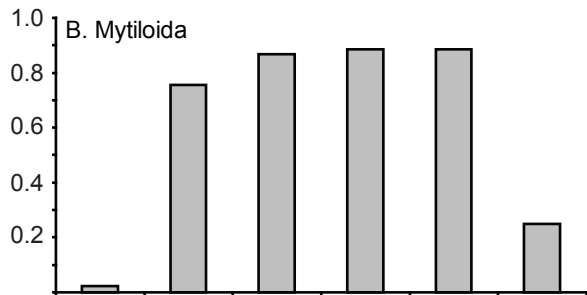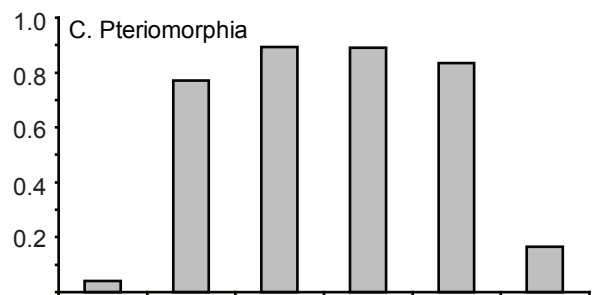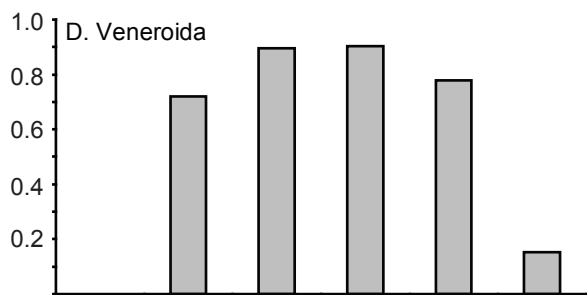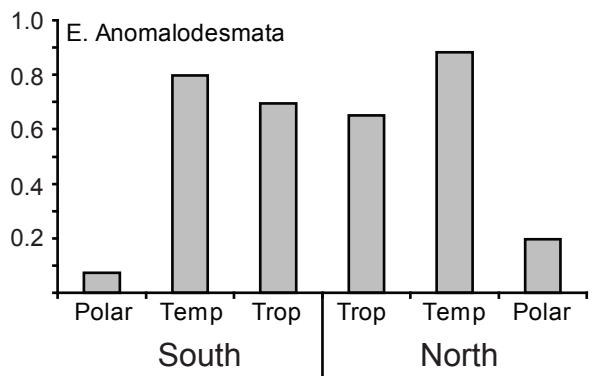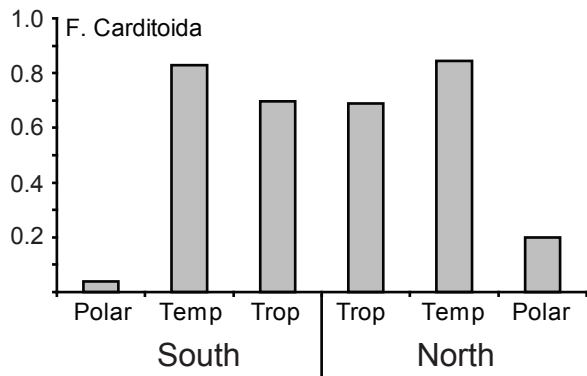

Supplement: pnas_0709202104_2.pdf [file pnas_0709202104_2.pdf]

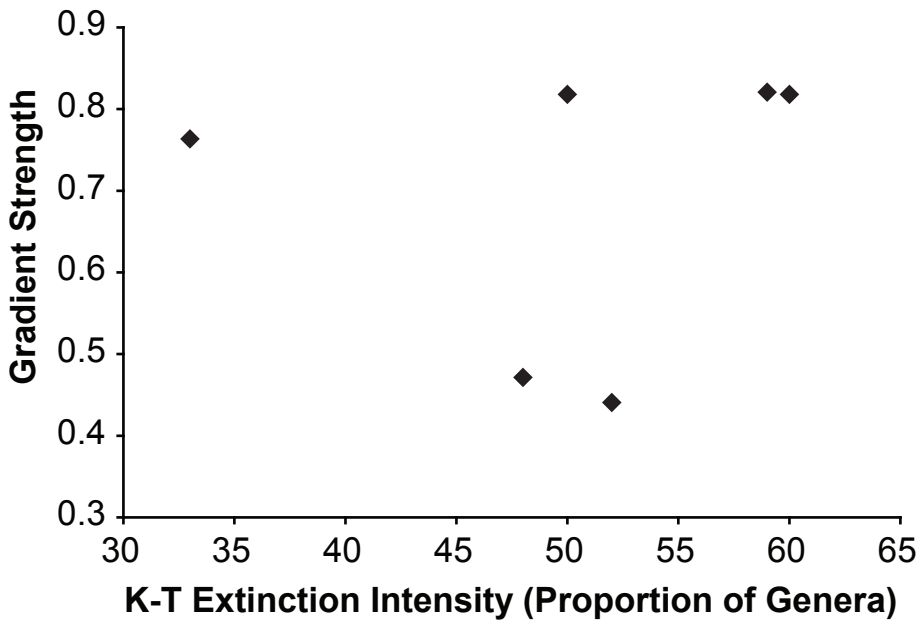

Supplement: pnas_0709202104_3.pdf [file pnas_0709202104_3.pdf]

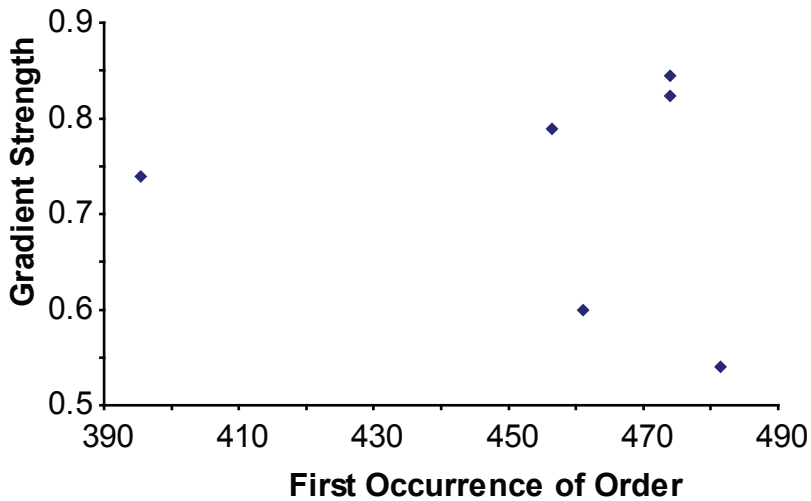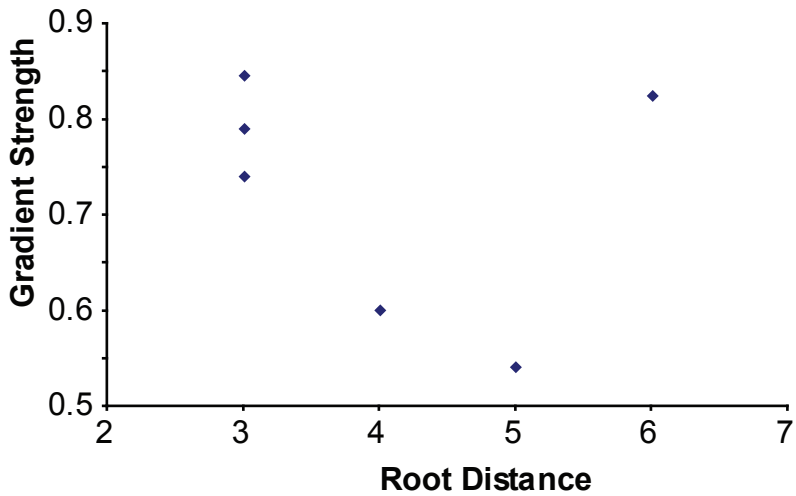

Supplement: pnas_0709202104_4.pdf [file pnas_0709202104_4.pdf]
